# Supplementary material for: A combined experimental and computational study on the reaction dynamics of the 1-propynyl radical (CH3CC; X2A1) with ethylene (H2CCH2; X1A1g) and the formation of 1-penten-3-yne (CH2CHCCCH3; X1A′)
Source: Royal Society of Chemistry journal article supplement (doi:10.1039/c9cp04073k), 2019-01-01
Supplement: c9cp04073k1.pdf [file c9cp04073k1.pdf]

## Supplementary information

### **A Combined Experimental and Computational Study on the Reaction Dynamics of the 1-Propynyl Radical ( $\text{CH}_3\text{CC}$ ; $\text{X}^2\text{A}_1$ ) with Ethylene ( $\text{H}_2\text{CCH}_2$ ; $\text{X}^1\text{A}_{1g}$ ) and the Formation of 1-Penten-3-yne ( $\text{CH}_2\text{CHCCCH}_3$ ; $\text{X}^1\text{A}'$ )**

Chao He,<sup>a</sup> Long Zhao,<sup>a</sup> Aaron M. Thomas,<sup>a</sup> Galiya R. Galimova,<sup>b,c</sup> Alexander M. Mebel,<sup>b,c,\*</sup> Ralf I. Kaiser,<sup>a,\*</sup>

<sup>a</sup> *Department of Chemistry, University of Hawai'i at Manoa, Honolulu, Hawaii 96822, USA*

<sup>b</sup> *Department of Chemistry and Biochemistry, Florida International University, Miami, Florida 33199, USA*

<sup>c</sup> *Samara National Research University, Samara 443086*

---

\* Corresponding Authors:

Prof. Ralf I. Kaiser: [ralfk@hawaii.edu](mailto:ralfk@hawaii.edu)

Prof. Alexander M. Mebel: [mebela@fiu.edu](mailto:mebela@fiu.edu)

**Optimized Cartesian coordinates (in Å) and calculated vibrational frequencies (in cm<sup>-1</sup>) of the reactants, products, intermediates, and transition states in the 1-propynyl plus ethylene reaction; point groups and electronic ground states are also given.**

**Reactants**

**C<sub>2</sub>H<sub>4</sub>, D<sub>2h</sub>, <sup>1</sup>A<sub>1g</sub>**

|   |   |            |            |          |
|---|---|------------|------------|----------|
| 6 | 0 | -0.663585  | 0.000000   | 0.000000 |
| 6 | 0 | 0.663426   | 0.000000   | 0.000000 |
| 1 | 0 | -1.2360973 | 0.9225588  | 0.000000 |
| 1 | 0 | -1.2360973 | -0.9225588 | 0.000000 |
| 1 | 0 | 1.2360973  | -0.9225588 | 0.000000 |
| 1 | 0 | 1.2360973  | 0.9225588  | 0.000000 |

Frequencies

|           |           |           |
|-----------|-----------|-----------|
| 840.4073  | 955.5511  | 966.0451  |
| 1066.4178 | 1248.6545 | 1385.0246 |
| 1481.1861 | 1700.2203 | 3122.6829 |
| 3138.2058 | 3193.6533 | 3222.3305 |

**C<sub>3</sub>H<sub>3</sub>, C<sub>3v</sub>, <sup>2</sup>A<sub>1</sub>**

|   |           |           |           |
|---|-----------|-----------|-----------|
| H | 0.000000  | 1.021621  | -1.512622 |
| C | 0.000000  | 0.000000  | -1.133496 |
| C | 0.000000  | 0.000000  | 0.336404  |
| H | 0.884750  | -0.510811 | -1.512622 |
| H | -0.884750 | -0.510811 | -1.512622 |
| C | 0.000000  | 0.000000  | 1.553404  |

Frequencies

|       |       |       |
|-------|-------|-------|
| 125.  | 125.  | 934.  |
| 1009. | 1009. | 1410. |
| 1479. | 1479. | 2190. |
| 3054. | 3133. | 3133. |

**Products**

**p1, C<sub>1</sub>, <sup>1</sup>A**

|   |   |           |           |           |
|---|---|-----------|-----------|-----------|
| 6 | 0 | 2.412835  | 0.467137  | 0.000090  |
| 6 | 0 | 1.466252  | -0.478208 | -0.000286 |
| 6 | 0 | 0.065922  | -0.231158 | 0.000896  |
| 6 | 0 | -1.129112 | -0.061591 | 0.000074  |
| 6 | 0 | -2.568466 | 0.159753  | -0.000500 |
| 1 | 0 | 2.166425  | 1.523264  | 0.000275  |
| 1 | 0 | 3.464364  | 0.202797  | -0.001432 |
| 1 | 0 | 1.766397  | -1.525073 | -0.000632 |
| 1 | 0 | -2.906494 | 0.572510  | 0.955207  |
| 1 | 0 | -2.861032 | 0.863949  | -0.785333 |
| 1 | 0 | -3.114252 | -0.773045 | -0.169728 |

Frequencies

|           |           |           |
|-----------|-----------|-----------|
| 14.5923   | 140.7524  | 185.3916  |
| 327.5848  | 378.8949  | 539.7050  |
| 698.8686  | 723.3435  | 930.3995  |
| 1006.6882 | 1054.6076 | 1058.8481 |

|           |           |           |
|-----------|-----------|-----------|
| 1064.4256 | 1198.6176 | 1329.4444 |
| 1429.7840 | 1457.4707 | 1495.1518 |
| 1495.4054 | 1676.6979 | 2334.9605 |
| 3024.4957 | 3077.1205 | 3082.6455 |
| 3126.6112 | 3145.2144 | 3232.0848 |

**p2, C<sub>s</sub>, <sup>1</sup>A'**

|   |   |           |           |           |
|---|---|-----------|-----------|-----------|
| 6 | 0 | 2.303006  | 0.468267  | -0.000056 |
| 6 | 0 | 1.208813  | -0.562208 | -0.000058 |
| 6 | 0 | -0.081242 | -0.297947 | 0.000273  |
| 6 | 0 | -1.319936 | -0.040173 | 0.000131  |
| 6 | 0 | -2.608442 | 0.223353  | -0.000177 |
| 1 | 0 | 2.946875  | 0.351156  | 0.878968  |
| 1 | 0 | 1.901450  | 1.482108  | -0.000365 |
| 1 | 0 | 2.947227  | 0.350689  | -0.878726 |
| 1 | 0 | 1.523935  | -1.606052 | -0.000405 |
| 1 | 0 | -3.351380 | -0.569480 | -0.000164 |
| 1 | 0 | -2.981299 | 1.243831  | 0.000016  |

Frequencies

|           |           |           |
|-----------|-----------|-----------|
| 140.2495  | 143.9206  | 227.7823  |
| 314.3685  | 487.5495  | 530.8085  |
| 572.8298  | 802.1213  | 843.1650  |
| 857.6205  | 1038.5717 | 1044.2669 |
| 1057.0052 | 1114.3047 | 1331.0923 |
| 1417.6150 | 1458.9503 | 1497.6416 |
| 1505.9957 | 1702.6157 | 2199.5772 |
| 3018.0836 | 3059.3352 | 3105.7725 |
| 3116.9552 | 3125.3681 | 3189.3916 |

**p3, C<sub>s</sub>, <sup>1</sup>A'**

|   |   |           |           |           |
|---|---|-----------|-----------|-----------|
| 6 | 0 | -2.497817 | -0.194376 | -0.000081 |
| 6 | 0 | -1.246966 | 0.164856  | 0.000064  |
| 6 | 0 | 0.015734  | 0.524038  | 0.000093  |
| 6 | 0 | 1.140868  | -0.407567 | 0.000078  |
| 6 | 0 | 2.423626  | -0.032686 | -0.000083 |
| 1 | 0 | -3.046891 | -0.350952 | -0.925810 |
| 1 | 0 | -3.047166 | -0.351077 | 0.925438  |
| 1 | 0 | 0.252330  | 1.588276  | 0.000162  |
| 1 | 0 | 0.888272  | -1.465254 | 0.000199  |
| 1 | 0 | 3.226780  | -0.760655 | -0.000093 |
| 1 | 0 | 2.714005  | 1.014070  | -0.000322 |

Frequencies

|           |           |           |
|-----------|-----------|-----------|
| 128.6648  | 166.1215  | 347.7932  |
| 401.9535  | 507.6400  | 568.5394  |
| 731.4523  | 869.4481  | 903.7782  |
| 919.8823  | 923.4832  | 1021.4790 |
| 1030.5881 | 1117.3237 | 1192.8015 |
| 1318.2218 | 1344.3802 | 1452.9101 |
| 1494.0295 | 1686.6520 | 2035.7348 |
| 3105.7778 | 3114.7545 | 3134.3633 |

3152.3162                      3173.2942                      3221.3942

**p4, C<sub>s</sub>, <sup>1</sup>A'**

|   |   |           |           |           |
|---|---|-----------|-----------|-----------|
| 6 | 0 | 0.534359  | -1.062117 | 0.000042  |
| 6 | 0 | 1.498651  | 0.121478  | -0.000168 |
| 6 | 0 | 0.518068  | 1.045864  | 0.000006  |
| 6 | 0 | -0.552437 | 0.036009  | 0.000255  |
| 6 | 0 | -1.882004 | 0.030344  | -0.000133 |
| 1 | 0 | 0.554012  | -1.697982 | -0.891018 |
| 1 | 0 | 0.554407  | -1.697349 | 0.891570  |
| 1 | 0 | 2.581033  | 0.179846  | -0.000569 |
| 1 | 0 | 0.509659  | 2.130706  | 0.000514  |
| 1 | 0 | -2.444653 | -0.897645 | -0.000102 |
| 1 | 0 | -2.454277 | 0.952953  | -0.000407 |

Frequencies

|           |           |           |
|-----------|-----------|-----------|
| 219.6216  | 346.3393  | 491.5043  |
| 706.1112  | 717.6776  | 773.9944  |
| 874.5550  | 878.7935  | 912.3367  |
| 938.8758  | 975.7586  | 1020.7172 |
| 1106.2067 | 1111.7806 | 1191.4664 |
| 1220.0940 | 1320.5431 | 1451.4861 |
| 1486.5685 | 1592.3423 | 1740.4855 |
| 3034.0189 | 3075.0580 | 3131.6679 |
| 3179.7111 | 3210.9853 | 3211.6255 |

**p5, C<sub>2v</sub>, <sup>1</sup>A<sub>1</sub>**

|   |   |           |           |           |
|---|---|-----------|-----------|-----------|
| 6 | 0 | 1.181322  | -0.272975 | 0.000338  |
| 6 | 0 | 0.727847  | 0.994273  | 0.000106  |
| 6 | 0 | -0.741114 | 0.984520  | -0.000059 |
| 6 | 0 | -1.177507 | -0.288684 | -0.000080 |
| 6 | 0 | 0.008109  | -1.215833 | -0.000016 |
| 1 | 0 | 2.215632  | -0.592729 | -0.000265 |
| 1 | 0 | 1.335894  | 1.891560  | -0.000683 |
| 1 | 0 | -1.361078 | 1.873585  | 0.000143  |
| 1 | 0 | -2.207441 | -0.622301 | 0.000448  |
| 1 | 0 | 0.013086  | -1.878139 | -0.876888 |
| 1 | 0 | 0.011961  | -1.879778 | 0.875509  |

Frequencies

|           |           |           |
|-----------|-----------|-----------|
| 349.4174  | 521.4491  | 678.9551  |
| 704.1414  | 817.9793  | 819.7035  |
| 921.6188  | 925.3197  | 940.9081  |
| 942.0991  | 972.7377  | 1013.6376 |
| 1115.3978 | 1133.2492 | 1137.7369 |
| 1274.8306 | 1321.0652 | 1404.7178 |
| 1431.5497 | 1556.6425 | 1643.8042 |
| 3015.1893 | 3035.2267 | 3184.8479 |
| 3195.3132 | 3213.9413 | 3220.7796 |

**p6, C<sub>s</sub>, <sup>1</sup>A'**

|   |   |          |           |          |
|---|---|----------|-----------|----------|
| 6 | 0 | 2.184841 | -0.459797 | 0.000417 |
|---|---|----------|-----------|----------|

|   |   |           |           |           |
|---|---|-----------|-----------|-----------|
| 6 | 0 | 1.083919  | 0.234051  | -0.000811 |
| 6 | 0 | -0.026527 | 0.932333  | -0.000249 |
| 6 | 0 | -1.397106 | 0.394185  | 0.000350  |
| 6 | 0 | -1.748395 | -0.893883 | -0.000152 |
| 1 | 0 | 2.669530  | -0.764426 | -0.924595 |
| 1 | 0 | 2.667868  | -0.762898 | 0.926838  |
| 1 | 0 | 0.064645  | 2.017764  | -0.000305 |
| 1 | 0 | -2.179881 | 1.149258  | 0.001379  |
| 1 | 0 | -1.011343 | -1.691084 | -0.001189 |
| 1 | 0 | -2.791209 | -1.189946 | 0.000539  |

Frequencies

|           |           |           |
|-----------|-----------|-----------|
| 62.5193   | 151.6007  | 320.0225  |
| 394.9380  | 502.1432  | 656.1715  |
| 713.7252  | 866.7064  | 909.2917  |
| 913.7683  | 924.4344  | 1021.8746 |
| 1023.2850 | 1055.9846 | 1161.0927 |
| 1344.1389 | 1385.6667 | 1454.1760 |
| 1486.1395 | 1685.7322 | 2032.3349 |
| 3103.8464 | 3120.9419 | 3137.0130 |
| 3150.5625 | 3170.9233 | 3223.4803 |

**p7, C<sub>2v</sub>, <sup>1</sup>A<sub>1</sub>**

|   |   |           |           |           |
|---|---|-----------|-----------|-----------|
| 6 | 0 | 1.494067  | 0.762275  | -0.000095 |
| 6 | 0 | 1.494269  | -0.762150 | -0.000117 |
| 6 | 0 | 0.226447  | -0.000123 | 0.000277  |
| 6 | 0 | -1.058833 | -0.000198 | 0.000261  |
| 6 | 0 | -2.365990 | 0.000074  | -0.000131 |
| 1 | 0 | 1.783047  | 1.274967  | 0.913043  |
| 1 | 0 | 1.782453  | 1.275106  | -0.913345 |
| 1 | 0 | 1.782938  | -1.274842 | -0.913372 |
| 1 | 0 | 1.783452  | -1.274585 | 0.913132  |
| 1 | 0 | -2.936137 | -0.000025 | 0.925069  |
| 1 | 0 | -2.935515 | 0.000113  | -0.925702 |

Frequencies

|           |           |           |
|-----------|-----------|-----------|
| 185.3946  | 187.3977  | 368.9275  |
| 561.7255  | 566.0530  | 651.4645  |
| 779.5575  | 842.2678  | 933.2625  |
| 936.2030  | 1009.3500 | 1031.9106 |
| 1049.4251 | 1070.1438 | 1088.5983 |
| 1179.7254 | 1373.6994 | 1465.0666 |
| 1480.0041 | 1544.8297 | 2107.1665 |
| 3101.7821 | 3102.5578 | 3113.8233 |
| 3174.7486 | 3183.0247 | 3189.0583 |

**Intermediates**

**i1, C<sub>1</sub>, <sup>1</sup>A**

|   |   |          |           |           |
|---|---|----------|-----------|-----------|
| 6 | 0 | 2.288265 | 0.657820  | -0.000005 |
| 6 | 0 | 1.477863 | -0.606339 | 0.000052  |
| 1 | 0 | 2.466020 | 1.187964  | 0.927897  |
| 1 | 0 | 2.467571 | 1.187022  | -0.928144 |

|   |   |           |           |           |
|---|---|-----------|-----------|-----------|
| 1 | 0 | 1.727257  | -1.215898 | -0.876907 |
| 1 | 0 | 1.727219  | -1.215792 | 0.877108  |
| 6 | 0 | 0.032266  | -0.335009 | 0.000039  |
| 6 | 0 | -1.144547 | -0.080584 | 0.000033  |
| 6 | 0 | -2.571468 | 0.221372  | -0.000008 |
| 1 | 0 | -3.038893 | -0.061698 | 0.947922  |
| 1 | 0 | -2.751029 | 1.290318  | -0.150005 |
| 1 | 0 | -3.092413 | -0.315482 | -0.798534 |

Frequencies

|           |           |           |
|-----------|-----------|-----------|
| 25.0971   | 91.3661   | 127.4193  |
| 197.3995  | 291.3774  | 381.2467  |
| 463.6284  | 571.6792  | 745.5827  |
| 780.4665  | 1042.3699 | 1061.4431 |
| 1062.9018 | 1096.3492 | 1153.6019 |
| 1294.2792 | 1321.3529 | 1431.8406 |
| 1467.0569 | 1485.5884 | 1498.4652 |
| 1498.5593 | 2350.7478 | 3010.9068 |
| 3024.7163 | 3039.6632 | 3078.6137 |
| 3079.1912 | 3140.8889 | 3246.9948 |

**i2**, C<sub>1</sub>, <sup>1</sup>A

|   |   |           |           |           |
|---|---|-----------|-----------|-----------|
| 6 | 0 | -2.399951 | 0.487194  | 0.000477  |
| 6 | 0 | -1.340100 | -0.572603 | 0.001864  |
| 6 | 0 | 0.007077  | -0.310185 | -0.001525 |
| 6 | 0 | 1.207181  | -0.069870 | -0.006771 |
| 6 | 0 | 2.634542  | 0.209635  | 0.002048  |
| 1 | 0 | -3.051664 | 0.399126  | -0.878279 |
| 1 | 0 | -1.967259 | 1.488708  | 0.000426  |
| 1 | 0 | -1.663089 | -1.611031 | 0.005061  |
| 1 | 0 | 3.193740  | -0.549627 | -0.554192 |
| 1 | 0 | 2.854399  | 1.181856  | -0.450203 |
| 1 | 0 | 3.034712  | 0.226237  | 1.022642  |
| 1 | 0 | -3.053329 | 0.399707  | 0.877990  |

Frequencies

|           |           |           |
|-----------|-----------|-----------|
| 17.8957   | 78.7730   | 134.7538  |
| 171.8081  | 305.4275  | 390.8366  |
| 534.6272  | 581.3148  | 733.2365  |
| 981.6293  | 1014.1412 | 1041.7795 |
| 1059.3579 | 1109.5417 | 1238.9884 |
| 1416.1093 | 1419.0351 | 1433.4677 |
| 1490.1188 | 1493.1595 | 1494.5976 |
| 1514.5101 | 2149.8115 | 2998.1976 |
| 3009.8082 | 3030.1157 | 3056.7073 |
| 3073.8572 | 3109.8021 | 3140.0830 |

**i3**, C<sub>s</sub>, <sup>2</sup>A'

|   |   |           |           |           |
|---|---|-----------|-----------|-----------|
| 6 | 0 | -0.602569 | 0.954419  | 0.000075  |
| 6 | 0 | -1.666602 | -0.201492 | 0.000070  |
| 6 | 0 | -0.427579 | -1.071374 | -0.000199 |
| 6 | 0 | 0.501033  | -0.118058 | -0.000037 |

|   |   |           |           |           |
|---|---|-----------|-----------|-----------|
| 6 | 0 | 1.982208  | -0.014071 | 0.000000  |
| 1 | 0 | -0.631618 | 1.581505  | -0.897255 |
| 1 | 0 | -0.631554 | 1.581312  | 0.897545  |
| 1 | 0 | -2.294039 | -0.256971 | 0.892273  |
| 1 | 0 | -2.294139 | -0.256753 | -0.892076 |
| 1 | 0 | 2.344573  | 0.530187  | -0.879319 |
| 1 | 0 | 2.344665  | 0.528398  | 0.880391  |
| 1 | 0 | 2.443168  | -1.004218 | -0.001014 |

Frequencies

|           |           |           |
|-----------|-----------|-----------|
| 152.9762  | 212.9875  | 314.5903  |
| 406.3108  | 650.2554  | 807.3783  |
| 847.1772  | 879.8139  | 990.4285  |
| 997.7135  | 1030.1953 | 1057.5808 |
| 1104.1248 | 1130.5530 | 1170.0126 |
| 1206.7255 | 1245.2527 | 1423.9253 |
| 1475.8793 | 1494.3407 | 1498.7281 |
| 1503.9955 | 1700.5028 | 3014.6650 |
| 3019.3643 | 3059.5515 | 3059.6757 |
| 3072.4881 | 3103.4360 | 3106.9243 |

**i4**, C<sub>s</sub>, <sup>2</sup>A'

|   |   |           |           |           |
|---|---|-----------|-----------|-----------|
| 6 | 0 | -2.100748 | 0.710885  | -0.000006 |
| 6 | 0 | -1.486984 | -0.475615 | 0.000012  |
| 6 | 0 | -0.035019 | -0.712230 | -0.000017 |
| 6 | 0 | 0.927852  | 0.187177  | 0.000017  |
| 6 | 0 | 2.391543  | 0.266486  | 0.000003  |
| 1 | 0 | -3.182525 | 0.783808  | 0.000022  |
| 1 | 0 | -1.544396 | 1.643091  | -0.000056 |
| 1 | 0 | -2.098069 | -1.375844 | 0.000051  |
| 1 | 0 | 2.767495  | 0.797848  | -0.880928 |
| 1 | 0 | 2.767517  | 0.797776  | 0.880967  |
| 1 | 0 | 2.844073  | -0.737815 | -0.000046 |
| 1 | 0 | 0.266043  | -1.769082 | -0.000062 |

Frequencies

|           |           |           |
|-----------|-----------|-----------|
| 17.3942   | 161.7137  | 170.2754  |
| 210.8171  | 336.6416  | 594.0050  |
| 616.4883  | 812.3662  | 871.1628  |
| 919.1050  | 1005.7045 | 1023.5762 |
| 1039.3748 | 1052.8037 | 1130.7563 |
| 1313.3407 | 1345.6393 | 1413.4904 |
| 1453.6684 | 1469.8396 | 1490.3503 |
| 1676.6492 | 1737.8713 | 2962.5330 |
| 2999.1632 | 3044.0132 | 3065.0680 |
| 3134.5019 | 3143.6795 | 3221.9623 |

**i5**, C<sub>s</sub>, <sup>2</sup>A''

|   |   |           |           |           |
|---|---|-----------|-----------|-----------|
| 6 | 0 | -2.077996 | -0.622064 | 0.000134  |
| 6 | 0 | -1.361571 | 0.539174  | 0.000120  |
| 6 | 0 | 0.047250  | 0.689254  | -0.000296 |
| 6 | 0 | 1.007415  | -0.354182 | -0.000257 |

|   |   |           |           |           |
|---|---|-----------|-----------|-----------|
| 6 | 0 | 2.351281  | -0.158505 | 0.000274  |
| 1 | 0 | -3.161299 | -0.606420 | 0.000322  |
| 1 | 0 | -1.609830 | -1.600288 | -0.000048 |
| 1 | 0 | -1.929867 | 1.467593  | 0.000352  |
| 1 | 0 | 0.432857  | 1.706217  | -0.000554 |
| 1 | 0 | 3.047181  | -0.989170 | 0.000292  |
| 1 | 0 | 0.643859  | -1.379704 | -0.000933 |
| 1 | 0 | 2.778822  | 0.839711  | 0.000717  |

Frequencies

|           |           |           |
|-----------|-----------|-----------|
| 140.3470  | 219.6396  | 236.0154  |
| 396.6513  | 576.2881  | 612.7927  |
| 621.3443  | 810.2525  | 834.9941  |
| 865.0951  | 923.4160  | 993.9130  |
| 1006.7881 | 1044.8268 | 1102.1672 |
| 1198.4038 | 1274.7032 | 1319.1819 |
| 1387.2661 | 1453.8754 | 1490.2144 |
| 1555.8896 | 1599.7731 | 3128.6356 |
| 3135.1311 | 3140.7146 | 3149.7473 |
| 3153.8103 | 3226.8577 | 3231.7040 |

**i6, C<sub>s</sub>, 2A''**

|   |   |           |           |           |
|---|---|-----------|-----------|-----------|
| 6 | 0 | -0.636770 | -1.050700 | 0.000132  |
| 6 | 0 | -1.602785 | 0.137835  | -0.000553 |
| 6 | 0 | -0.539427 | 1.043429  | 0.000155  |
| 6 | 0 | 0.441100  | 0.046786  | 0.001128  |
| 6 | 0 | 1.923057  | 0.002390  | -0.000288 |
| 1 | 0 | -0.664375 | -1.689900 | 0.890310  |
| 1 | 0 | -0.662812 | -1.689037 | -0.890783 |
| 1 | 0 | -2.681103 | 0.221817  | -0.000503 |
| 1 | 0 | 2.315773  | -0.533119 | 0.874367  |
| 1 | 0 | 2.314276  | -0.523762 | -0.881385 |
| 1 | 0 | 2.353353  | 1.007389  | 0.004545  |
| 1 | 0 | -0.486158 | 2.128174  | 0.000005  |

Frequencies

|           |           |           |
|-----------|-----------|-----------|
| 115.9174  | 204.4059  | 313.5536  |
| 407.3383  | 491.5221  | 648.9638  |
| 866.1406  | 879.9623  | 932.2882  |
| 938.1144  | 983.6047  | 1032.8148 |
| 1054.7651 | 1097.6392 | 1168.6245 |
| 1207.1977 | 1265.9238 | 1368.3132 |
| 1419.9289 | 1463.9160 | 1485.7267 |
| 1493.2072 | 1535.6806 | 2990.7120 |
| 3019.1845 | 3019.8327 | 3054.8683 |
| 3087.1638 | 3172.2644 | 3222.8819 |

**i7, C<sub>s</sub>, 2A''**

|   |   |           |           |           |
|---|---|-----------|-----------|-----------|
| 6 | 0 | 1.644522  | -0.857151 | 0.114435  |
| 6 | 0 | 1.283954  | 0.436240  | -0.105834 |
| 6 | 0 | -0.000056 | 1.038010  | -0.000033 |
| 6 | 0 | -1.284055 | 0.436306  | 0.105674  |



|   |   |           |           |           |
|---|---|-----------|-----------|-----------|
| 1 | 0 | 2.677052  | -1.167107 | 0.000458  |
| 1 | 0 | 0.948696  | -1.610394 | 0.460699  |
| 1 | 0 | 2.087089  | 1.126844  | -0.360431 |
| 1 | 0 | -0.000045 | 2.125146  | 0.000684  |
| 1 | 0 | -2.087270 | 1.126853  | 0.360187  |
| 6 | 0 | -1.644396 | -0.857284 | -0.114346 |
| 1 | 0 | -0.948494 | -1.610487 | -0.460574 |
| 1 | 0 | -2.676841 | -1.167577 | -0.000394 |

Frequencies

|           |           |           |
|-----------|-----------|-----------|
| 131.4346  | 243.2599  | 276.3547  |
| 378.2287  | 570.6494  | 589.8829  |
| 699.8784  | 799.1252  | 858.9677  |
| 864.0971  | 901.8146  | 983.0130  |
| 999.3600  | 1015.0480 | 1129.5670 |
| 1183.6625 | 1271.9681 | 1319.9803 |
| 1424.7333 | 1458.9882 | 1481.6036 |
| 1566.7283 | 1608.2827 | 3117.9844 |
| 3123.0181 | 3149.9586 | 3151.7990 |
| 3159.6657 | 3234.7608 | 3245.9855 |

**i8**, C<sub>2v</sub>, <sup>2</sup>B<sub>1</sub>

|   |   |           |           |           |
|---|---|-----------|-----------|-----------|
| 6 | 0 | -0.971144 | 0.779378  | 0.000105  |
| 6 | 0 | 0.491373  | 1.145554  | -0.000027 |
| 6 | 0 | 1.274042  | 0.000256  | -0.000014 |
| 6 | 0 | 0.491897  | -1.145400 | 0.000050  |
| 6 | 0 | -0.970877 | -0.779724 | -0.000115 |
| 1 | 0 | -1.492560 | 1.187841  | 0.874846  |
| 1 | 0 | -1.492822 | 1.188260  | -0.874303 |
| 1 | 0 | 0.859133  | 2.164185  | -0.000355 |
| 1 | 0 | 2.359045  | 0.000526  | 0.000104  |
| 1 | 0 | 0.859927  | -2.163923 | 0.000182  |
| 1 | 0 | -1.492370 | -1.188733 | 0.874342  |
| 1 | 0 | -1.492104 | -1.188541 | -0.874810 |

Frequencies

|           |           |           |
|-----------|-----------|-----------|
| 123.3985  | 449.5643  | 589.1850  |
| 628.7035  | 728.6058  | 809.7195  |
| 811.6027  | 908.2287  | 912.7549  |
| 938.2719  | 999.8375  | 1029.8342 |
| 1074.8056 | 1107.6384 | 1155.1607 |
| 1234.1435 | 1283.7912 | 1308.2313 |
| 1323.3094 | 1407.0676 | 1484.9853 |
| 1486.2507 | 1508.3013 | 3000.6401 |
| 3010.5385 | 3014.3774 | 3033.4642 |
| 3178.7623 | 3200.8294 | 3212.8516 |

**i9**, C<sub>1</sub>, <sup>1</sup>A

|   |   |           |           |           |
|---|---|-----------|-----------|-----------|
| 6 | 0 | 1.899691  | 0.682555  | -0.153016 |
| 6 | 0 | 1.344921  | -0.533038 | 0.099453  |
| 6 | 0 | -0.033914 | -0.803289 | -0.097932 |
| 6 | 0 | -1.012165 | 0.108340  | 0.404529  |

|   |   |           |           |           |
|---|---|-----------|-----------|-----------|
| 6 | 0 | -2.210690 | 0.179966  | -0.217939 |
| 1 | 0 | 1.283009  | 1.556175  | -0.338770 |
| 1 | 0 | 2.966452  | 0.796952  | -0.320018 |
| 1 | 0 | 2.011840  | -1.388623 | 0.214381  |
| 1 | 0 | -0.801005 | 0.797790  | 1.230613  |
| 1 | 0 | -2.443813 | -0.515718 | -1.016732 |
| 1 | 0 | -2.943536 | 0.946216  | 0.019960  |

Frequencies

|           |           |           |
|-----------|-----------|-----------|
| 76.8546   | 181.5283  | 271.5523  |
| 351.7344  | 459.8707  | 681.8327  |
| 714.1864  | 876.7780  | 908.8932  |
| 960.6529  | 991.6463  | 1010.9743 |
| 1049.6789 | 1112.9804 | 1279.0171 |
| 1310.5675 | 1328.7039 | 1430.4383 |
| 1446.0937 | 1567.8124 | 1613.1988 |
| 3033.9176 | 3105.3683 | 3130.1829 |
| 3134.7083 | 3217.0264 | 3233.9782 |

**i10**, C<sub>s</sub>, <sup>1</sup>A'

|   |   |           |           |           |
|---|---|-----------|-----------|-----------|
| 6 | 0 | 2.497705  | -0.194507 | 0.000145  |
| 6 | 0 | 1.246926  | 0.164982  | 0.000165  |
| 6 | 0 | -0.015732 | 0.524341  | 0.000128  |
| 6 | 0 | -1.140747 | -0.407481 | -0.000114 |
| 6 | 0 | -2.423591 | -0.032903 | -0.000264 |
| 1 | 0 | 3.046858  | -0.351260 | -0.925495 |
| 1 | 0 | 3.046813  | -0.351526 | 0.925771  |
| 1 | 0 | -0.252358 | 1.588544  | 0.000239  |
| 1 | 0 | -0.887885 | -1.465097 | -0.000204 |
| 1 | 0 | -3.226590 | -0.761044 | -0.000484 |
| 1 | 0 | -2.714210 | 1.013787  | -0.000187 |

Frequencies

|           |           |           |
|-----------|-----------|-----------|
| 128.6602  | 166.1351  | 347.8241  |
| 401.9350  | 507.6192  | 568.5615  |
| 731.4593  | 869.4492  | 903.7062  |
| 919.8570  | 923.4752  | 1021.4832 |
| 1030.5796 | 1117.2865 | 1192.7059 |
| 1318.1900 | 1344.3368 | 1452.9084 |
| 1493.9940 | 1686.6494 | 2035.6997 |
| 3105.7645 | 3115.0159 | 3134.3630 |
| 3152.3867 | 3173.2835 | 3221.3814 |

**i11**, C<sub>s</sub>, <sup>1</sup>A'

|   |   |           |           |           |
|---|---|-----------|-----------|-----------|
| 6 | 0 | 2.184841  | -0.459797 | 0.000417  |
| 6 | 0 | 1.083919  | 0.234051  | -0.000811 |
| 6 | 0 | -0.026527 | 0.932333  | -0.000249 |
| 6 | 0 | -1.397106 | 0.394185  | 0.000350  |
| 6 | 0 | -1.748395 | -0.893883 | -0.000152 |
| 1 | 0 | 2.669530  | -0.764426 | -0.924595 |
| 1 | 0 | 2.667868  | -0.762898 | 0.926838  |
| 1 | 0 | 0.064645  | 2.017764  | -0.000305 |

|   |   |           |           |           |
|---|---|-----------|-----------|-----------|
| 1 | 0 | -2.179881 | 1.149258  | 0.001379  |
| 1 | 0 | -1.011343 | -1.691084 | -0.001189 |
| 1 | 0 | -2.791209 | -1.189946 | 0.000539  |

Frequencies

|           |           |           |
|-----------|-----------|-----------|
| 62.5193   | 151.6007  | 320.0225  |
| 394.9380  | 502.1432  | 656.1715  |
| 713.7252  | 866.7064  | 909.2917  |
| 913.7683  | 924.4344  | 1021.8746 |
| 1023.2850 | 1055.9846 | 1161.0927 |
| 1344.1389 | 1385.6667 | 1454.1760 |
| 1486.1395 | 1685.7322 | 2032.3349 |
| 3103.8464 | 3120.9419 | 3137.0130 |
| 3150.5625 | 3170.9233 | 3223.4803 |

**i12**, C<sub>1</sub>, <sup>1</sup>A

|   |   |           |           |           |
|---|---|-----------|-----------|-----------|
| 6 | 0 | -2.241216 | -0.131670 | 0.068287  |
| 6 | 0 | -0.927239 | -0.368599 | -0.083675 |
| 6 | 0 | 0.054867  | 0.679499  | -0.034642 |
| 6 | 0 | 1.425029  | 0.491624  | -0.057571 |
| 6 | 0 | 1.933474  | -0.817453 | 0.031592  |
| 1 | 0 | -2.975927 | -0.923849 | -0.022831 |
| 1 | 0 | -2.622222 | 0.859421  | 0.298950  |
| 1 | 0 | -0.327591 | 1.695737  | 0.067308  |
| 1 | 0 | 2.043378  | 1.396936  | -0.058444 |
| 1 | 0 | -0.547633 | -1.368570 | -0.268206 |
| 1 | 0 | 2.960507  | -0.780085 | 0.439276  |

Frequencies

|           |           |           |
|-----------|-----------|-----------|
| 140.0756  | 246.6940  | 273.8385  |
| 397.6968  | 473.3084  | 621.2836  |
| 670.8267  | 881.6230  | 942.4640  |
| 959.5706  | 998.9138  | 1050.9007 |
| 1070.6903 | 1109.6898 | 1205.9229 |
| 1255.8101 | 1306.2696 | 1415.2648 |
| 1486.1333 | 1552.8097 | 1663.0042 |
| 2963.9707 | 3033.5865 | 3128.4711 |
| 3134.9705 | 3182.1207 | 3224.9065 |

**i13**, C<sub>1</sub>, <sup>1</sup>A

|   |   |           |           |           |
|---|---|-----------|-----------|-----------|
| 6 | 0 | -1.678806 | -0.666687 | 0.318155  |
| 6 | 0 | -1.164620 | 0.361031  | -0.416185 |
| 6 | 0 | 0.000010  | 1.037066  | 0.000015  |
| 1 | 0 | -1.108939 | -1.111499 | 1.125840  |
| 1 | 0 | -2.713535 | -0.979907 | 0.213084  |
| 1 | 0 | -1.782898 | 0.814067  | -1.190965 |
| 6 | 0 | 1.164603  | 0.361024  | 0.416189  |
| 6 | 0 | 1.678822  | -0.666626 | -0.318201 |
| 1 | 0 | 1.782794  | 0.813888  | 1.191122  |
| 1 | 0 | 1.109007  | -1.111432 | -1.125929 |
| 1 | 0 | 2.713513  | -0.979958 | -0.212985 |

Frequencies

|           |           |           |
|-----------|-----------|-----------|
| 131.1141  | 220.1593  | 270.7440  |
| 423.0526  | 535.2423  | 612.7921  |
| 767.2402  | 876.7220  | 908.8984  |
| 937.5597  | 943.1908  | 993.5179  |
| 1043.3998 | 1114.8836 | 1303.2866 |
| 1308.1686 | 1342.5473 | 1423.9227 |
| 1463.2672 | 1551.9825 | 1568.0228 |
| 3116.9522 | 3117.8269 | 3135.2657 |
| 3136.3894 | 3230.0223 | 3230.3721 |

**i14**, C<sub>1</sub>, <sup>1</sup>A

|   |   |           |           |           |
|---|---|-----------|-----------|-----------|
| 6 | 0 | -0.764664 | 0.897763  | -0.210528 |
| 6 | 0 | -1.104006 | -0.548923 | 0.077213  |
| 6 | 0 | -0.000303 | -1.342816 | 0.000008  |
| 6 | 0 | 1.103737  | -0.549364 | -0.077307 |
| 6 | 0 | 0.765072  | 0.897412  | 0.210542  |
| 1 | 0 | -1.398687 | 1.583284  | 0.362407  |
| 1 | 0 | -0.847450 | 1.193232  | -1.263912 |
| 1 | 0 | -2.066654 | -0.837777 | 0.493247  |
| 1 | 0 | 2.066395  | -0.838655 | -0.492948 |
| 1 | 0 | 0.848009  | 1.192720  | 1.263952  |
| 1 | 0 | 1.399371  | 1.582769  | -0.362316 |

Frequencies

|           |           |           |
|-----------|-----------|-----------|
| 220.7227  | 404.7667  | 602.0977  |
| 609.9614  | 795.8698  | 844.2964  |
| 877.6538  | 880.8425  | 933.3874  |
| 955.9878  | 1031.7894 | 1126.9170 |
| 1175.6573 | 1207.1872 | 1225.0967 |
| 1280.5302 | 1314.7263 | 1436.9621 |
| 1478.4719 | 1499.6507 | 1549.9015 |
| 3017.1894 | 3017.5492 | 3056.9077 |
| 3065.2012 | 3149.1803 | 3151.5028 |

**i15**, C<sub>1</sub>, <sup>1</sup>A

|   |   |           |           |           |
|---|---|-----------|-----------|-----------|
| 6 | 0 | 1.105415  | -0.640780 | 0.209717  |
| 6 | 0 | 0.888618  | 0.819404  | 0.003070  |
| 6 | 0 | -0.449484 | 1.079498  | -0.182542 |
| 6 | 0 | -1.358689 | -0.127016 | 0.271440  |
| 6 | 0 | -0.292346 | -0.817458 | -0.379230 |
| 1 | 0 | 1.201787  | -0.977847 | 1.248952  |
| 1 | 0 | 1.895827  | -1.103938 | -0.386105 |
| 1 | 0 | 1.660879  | 1.578232  | -0.119481 |
| 1 | 0 | -2.334178 | -0.139639 | -0.203107 |
| 1 | 0 | -1.417050 | -0.178974 | 1.358094  |
| 1 | 0 | -0.368340 | -1.059729 | -1.433082 |

Frequencies

|          |          |          |
|----------|----------|----------|
| 242.3878 | 412.2271 | 491.2915 |
| 544.0247 | 649.6578 | 809.2293 |
| 896.2513 | 931.5056 | 948.7042 |

|           |           |           |
|-----------|-----------|-----------|
| 999.6102  | 1049.7270 | 1091.7964 |
| 1139.4439 | 1183.2783 | 1236.9517 |
| 1261.0040 | 1279.3522 | 1411.1007 |
| 1492.1640 | 1513.9867 | 1519.4654 |
| 3012.9975 | 3079.4359 | 3095.2405 |
| 3114.4895 | 3176.0759 | 3195.0938 |

**i16, C<sub>1</sub>, <sup>1</sup>A**

|   |   |           |           |           |
|---|---|-----------|-----------|-----------|
| 6 | 0 | 0.130521  | 0.844982  | 0.081501  |
| 6 | 0 | 1.482037  | 0.194651  | -0.092227 |
| 6 | 0 | 1.989521  | -0.995388 | -0.133954 |
| 6 | 0 | -2.073569 | -0.298900 | -0.277419 |
| 6 | 0 | -0.958141 | -0.136608 | 0.424517  |
| 1 | 0 | -0.124270 | 1.394419  | -0.830659 |
| 1 | 0 | 0.219312  | 1.594635  | 0.878017  |
| 1 | 0 | 2.378444  | 0.832366  | -0.222763 |
| 1 | 0 | -2.833598 | -1.012506 | 0.022080  |
| 1 | 0 | -2.272699 | 0.272360  | -1.180131 |
| 1 | 0 | -0.789399 | -0.733698 | 1.318946  |

**Frequencies**

|           |           |           |
|-----------|-----------|-----------|
| 81.8377   | 131.3614  | 155.1149  |
| 335.2826  | 427.4946  | 545.8995  |
| 646.9833  | 849.7441  | 901.5935  |
| 941.0771  | 948.1791  | 1012.5654 |
| 1027.5279 | 1147.4323 | 1259.5032 |
| 1324.5574 | 1343.9402 | 1460.4560 |
| 1486.7127 | 1718.9561 | 1792.3281 |
| 2979.6778 | 3017.0001 | 3058.5129 |
| 3129.1699 | 3140.8993 | 3214.4181 |

**i17, C<sub>s</sub>, <sup>1</sup>A'**

|   |   |           |           |           |
|---|---|-----------|-----------|-----------|
| 6 | 0 | -1.329406 | 0.123647  | -0.000196 |
| 6 | 0 | -1.487932 | -1.163183 | 0.000237  |
| 6 | 0 | 1.431915  | -0.865804 | -0.000079 |
| 6 | 0 | 1.185875  | 0.437006  | -0.000015 |
| 6 | 0 | -0.170191 | 1.085148  | 0.000114  |
| 1 | 0 | -2.353916 | 0.533561  | -0.000829 |
| 1 | 0 | 2.442887  | -1.258967 | -0.000070 |
| 1 | 0 | 2.018521  | 1.138654  | 0.000011  |
| 1 | 0 | -0.260486 | 1.748088  | -0.870438 |
| 1 | 0 | -0.260527 | 1.747452  | 0.871161  |
| 1 | 0 | 0.631956  | -1.609679 | -0.000200 |

**Frequencies**

|           |           |           |
|-----------|-----------|-----------|
| 139.5972  | 179.4997  | 219.6322  |
| 340.6595  | 526.8435  | 586.2635  |
| 588.8070  | 843.5027  | 926.6353  |
| 929.8582  | 965.8756  | 994.4932  |
| 1014.4862 | 1081.0927 | 1240.7783 |
| 1321.8466 | 1369.7867 | 1460.6026 |
| 1478.9122 | 1720.6259 | 1779.6371 |

|           |           |           |
|-----------|-----------|-----------|
| 3011.7626 | 3020.0298 | 3026.8523 |
| 3061.8964 | 3135.5537 | 3198.0356 |

**Transition states**

**TS i2\_p1, C<sub>1</sub>, <sup>2</sup>A**

|   |   |           |           |           |
|---|---|-----------|-----------|-----------|
| 6 | 0 | 2.327038  | 0.350558  | -0.268096 |
| 6 | 0 | 1.381948  | -0.543276 | 0.058352  |
| 6 | 0 | -0.014577 | -0.275306 | 0.026709  |
| 6 | 0 | -1.200395 | -0.068495 | 0.010978  |
| 6 | 0 | -2.633104 | 0.193988  | -0.010595 |
| 1 | 0 | 3.376105  | 0.078297  | -0.260309 |
| 1 | 0 | 2.069970  | 1.337615  | -0.635941 |
| 1 | 0 | 1.676350  | -1.537180 | 0.386881  |
| 1 | 0 | -3.159848 | -0.447564 | 0.700092  |
| 1 | 0 | -2.842110 | 1.234308  | 0.250904  |
| 1 | 0 | -3.049023 | 0.007736  | -1.004367 |
| 1 | 0 | 2.763095  | 1.381974  | 1.658651  |

**Frequencies**

|           |           |           |
|-----------|-----------|-----------|
| 455.1315i | 71.7138   | 134.7601  |
| 153.1992  | 232.6918  | 272.3847  |
| 335.9403  | 412.1280  | 549.8892  |
| 723.8608  | 732.8306  | 953.6737  |
| 1002.4521 | 1057.6642 | 1062.1866 |
| 1071.3775 | 1205.4851 | 1322.8455 |
| 1433.4576 | 1453.7029 | 1501.5912 |
| 1504.0002 | 1661.7534 | 2368.2148 |
| 3053.0493 | 3120.9401 | 3129.1166 |
| 3166.8936 | 3179.1468 | 3264.6642 |

**TS i1\_i2, C<sub>1</sub>, <sup>2</sup>A**

|   |   |           |           |           |
|---|---|-----------|-----------|-----------|
| 6 | 0 | 2.415954  | 0.539516  | 0.047078  |
| 6 | 0 | 1.382264  | -0.539498 | 0.001529  |
| 6 | 0 | -0.004067 | -0.283741 | 0.019143  |
| 6 | 0 | -1.195671 | -0.065774 | 0.008455  |
| 6 | 0 | -2.629308 | 0.191616  | 0.002061  |
| 1 | 0 | 3.432287  | 0.279941  | 0.306305  |
| 1 | 0 | 2.106587  | 1.573711  | 0.007451  |
| 1 | 0 | 1.989628  | -0.155339 | -1.037486 |
| 1 | 0 | 1.725964  | -1.540235 | 0.244275  |
| 1 | 0 | -3.144364 | -0.410162 | 0.757946  |
| 1 | 0 | -2.843714 | 1.242485  | 0.219622  |
| 1 | 0 | -3.081412 | -0.043113 | -0.967710 |

**Frequencies**

|            |           |           |
|------------|-----------|-----------|
| 1915.4340i | 21.7053   | 133.0822  |
| 176.5031   | 308.2868  | 330.3486  |
| 475.3504   | 521.1165  | 627.3663  |
| 714.4908   | 780.3501  | 1006.5881 |
| 1054.2968  | 1060.6249 | 1105.7329 |
| 1228.9923  | 1261.1813 | 1401.3951 |
| 1429.6764  | 1434.4112 | 1493.4854 |

|           |           |           |
|-----------|-----------|-----------|
| 1497.9780 | 2168.3522 | 2286.6377 |
| 3015.1603 | 3062.3185 | 3074.7064 |
| 3152.4319 | 3160.8849 | 3285.2249 |

**TS i1\_i3, C<sub>s</sub>, <sup>2</sup>A'**

|   |   |           |           |           |
|---|---|-----------|-----------|-----------|
| 6 | 0 | 1.056734  | 1.055424  | -0.000074 |
| 6 | 0 | 1.625004  | -0.365051 | 0.000151  |
| 6 | 0 | 0.287301  | -1.033532 | -0.000191 |
| 6 | 0 | -0.710406 | -0.261543 | -0.000069 |
| 6 | 0 | -2.114378 | 0.145433  | 0.000079  |
| 1 | 0 | 1.080711  | 1.623551  | 0.924327  |
| 1 | 0 | 1.080626  | 1.623183  | -0.924706 |
| 1 | 0 | 2.226756  | -0.607467 | -0.880762 |
| 1 | 0 | 2.226232  | -0.607375 | 0.881443  |
| 1 | 0 | -2.365242 | 0.734718  | 0.886365  |
| 1 | 0 | -2.365058 | 0.736017  | -0.885394 |
| 1 | 0 | -2.749552 | -0.747011 | -0.000646 |

**Frequencies**

|                   |           |           |
|-------------------|-----------|-----------|
| 714.3000 <i>i</i> | 116.6511  | 177.0583  |
| 232.9853          | 292.0664  | 476.1543  |
| 623.6566          | 747.9255  | 808.2940  |
| 827.4436          | 980.8935  | 1015.9509 |
| 1055.7597         | 1086.2884 | 1114.3642 |
| 1220.6349         | 1274.0820 | 1415.3082 |
| 1436.8829         | 1479.8441 | 1497.5145 |
| 1500.1080         | 1911.0748 | 3024.7697 |
| 3042.1642         | 3074.0152 | 3083.6210 |
| 3088.7443         | 3113.8612 | 3225.0400 |

**TS i1\_i4, C<sub>1</sub>, <sup>2</sup>A**

|   |   |           |           |           |
|---|---|-----------|-----------|-----------|
| 6 | 0 | -2.416056 | 0.520105  | -0.004630 |
| 6 | 0 | -1.460217 | -0.466218 | -0.066122 |
| 6 | 0 | -0.034419 | -0.262459 | -0.008769 |
| 6 | 0 | 1.162166  | -0.014967 | -0.145661 |
| 6 | 0 | 2.595418  | 0.176851  | 0.025746  |
| 1 | 0 | -3.466833 | 0.261059  | -0.030592 |
| 1 | 0 | -2.150407 | 1.559821  | 0.140566  |
| 1 | 0 | -0.670933 | -0.753876 | 1.173259  |
| 1 | 0 | -1.765335 | -1.486196 | -0.288142 |
| 1 | 0 | 3.165082  | -0.455031 | -0.662722 |
| 1 | 0 | 2.879528  | 1.213379  | -0.180984 |
| 1 | 0 | 2.927545  | -0.059025 | 1.045232  |

**Frequencies**

|                    |           |           |
|--------------------|-----------|-----------|
| 1626.0971 <i>i</i> | 73.1473   | 122.4105  |
| 137.3819           | 313.6731  | 406.0116  |
| 529.7625           | 603.2648  | 641.3662  |
| 707.4805           | 747.5373  | 829.8161  |
| 1032.8195          | 1048.4076 | 1061.2707 |
| 1065.9894          | 1188.9712 | 1308.5219 |
| 1424.6441          | 1433.6864 | 1490.2850 |

|           |           |           |
|-----------|-----------|-----------|
| 1493.4650 | 1553.4272 | 2172.7982 |
| 2996.5580 | 3054.4442 | 3076.8165 |
| 3139.7761 | 3153.1091 | 3247.9421 |

**TS i4\_p1, C<sub>s</sub>, <sup>2</sup>A'**

|   |   |           |           |           |
|---|---|-----------|-----------|-----------|
| 6 | 0 | 2.302754  | -0.621595 | 0.000081  |
| 6 | 0 | 1.504679  | 0.451522  | -0.000134 |
| 6 | 0 | 0.073636  | 0.379796  | -0.000007 |
| 6 | 0 | -1.078548 | -0.019821 | -0.000053 |
| 6 | 0 | -2.507523 | -0.279340 | -0.000012 |
| 1 | 0 | 3.381283  | -0.510112 | -0.000048 |
| 1 | 0 | 1.906625  | -1.631015 | 0.000393  |
| 1 | 0 | 1.942763  | 1.444887  | -0.000424 |
| 1 | 0 | -0.309541 | 2.269601  | 0.000826  |
| 1 | 0 | -2.810967 | -0.848754 | -0.883773 |
| 1 | 0 | -2.810783 | -0.849490 | 0.883336  |
| 1 | 0 | -3.069364 | 0.661503  | 0.000436  |

Frequencies

|           |           |           |
|-----------|-----------|-----------|
| 643.7849i | 16.0886   | 87.1182   |
| 147.2772  | 196.4159  | 337.4294  |
| 399.1672  | 527.1600  | 610.1888  |
| 696.0325  | 717.4437  | 934.5572  |
| 1012.8077 | 1044.6430 | 1051.7024 |
| 1060.8923 | 1202.5503 | 1332.8996 |
| 1425.4803 | 1451.4596 | 1487.3443 |
| 1491.0445 | 1668.5651 | 2235.0876 |
| 3017.6825 | 3071.7931 | 3080.3592 |
| 3144.9053 | 3165.5691 | 3234.2738 |

**TS i2\_p2, C<sub>1</sub>, <sup>2</sup>A**

|   |   |           |           |           |
|---|---|-----------|-----------|-----------|
| 6 | 0 | -2.372256 | 0.486770  | -0.007869 |
| 6 | 0 | -1.300664 | -0.558634 | 0.080779  |
| 6 | 0 | -0.012124 | -0.318919 | -0.020431 |
| 6 | 0 | 1.224394  | -0.077308 | -0.119449 |
| 6 | 0 | 2.515080  | 0.171587  | -0.202619 |
| 1 | 0 | -3.065874 | 0.259162  | -0.823671 |
| 1 | 0 | -1.950061 | 1.477922  | -0.176005 |
| 1 | 0 | -2.961643 | 0.511665  | 0.914556  |
| 1 | 0 | -1.623161 | -1.586597 | 0.240105  |
| 1 | 0 | 3.246738  | -0.629056 | -0.162556 |
| 1 | 0 | 2.883947  | 1.175082  | -0.389785 |
| 1 | 0 | 3.143481  | 0.570852  | 2.014888  |

Frequencies

|           |           |           |
|-----------|-----------|-----------|
| 374.1942i | 131.7611  | 139.6858  |
| 166.3844  | 184.9955  | 266.6547  |
| 317.1979  | 534.0058  | 540.5406  |
| 589.3891  | 809.4870  | 859.8930  |
| 892.3789  | 1042.1819 | 1048.2618 |
| 1065.0497 | 1128.8366 | 1323.4431 |
| 1425.5381 | 1461.0728 | 1505.8864 |



|           |           |           |
|-----------|-----------|-----------|
| 1509.9632 | 1713.5909 | 2189.9144 |
| 3044.8789 | 3103.2615 | 3144.5314 |
| 3152.3123 | 3161.4471 | 3236.6830 |

**TS i4\_i5, C<sub>1</sub>, <sup>2</sup>A**

|   |   |           |           |           |
|---|---|-----------|-----------|-----------|
| 6 | 0 | 2.014039  | -0.718591 | 0.035204  |
| 6 | 0 | 1.416127  | 0.486977  | 0.067607  |
| 6 | 0 | 0.006949  | 0.761121  | -0.112300 |
| 6 | 0 | -0.977111 | -0.158891 | -0.294564 |
| 6 | 0 | -2.316255 | -0.232902 | 0.127903  |
| 1 | 0 | 3.080005  | -0.821740 | 0.202493  |
| 1 | 0 | 1.458029  | -1.624192 | -0.184841 |
| 1 | 0 | 2.037163  | 1.360463  | 0.258022  |
| 1 | 0 | -0.282464 | 1.814922  | -0.171742 |
| 1 | 0 | -3.002641 | -0.908577 | -0.375595 |
| 1 | 0 | -1.391666 | -1.116507 | 0.487408  |
| 1 | 0 | -2.760917 | 0.469343  | 0.841155  |

|            |           |           |
|------------|-----------|-----------|
| 1787.4289i | 150.0953  | 182.8898  |
| 200.9152   | 328.9447  | 504.9027  |
| 625.3356   | 666.8807  | 816.5259  |
| 885.7285   | 907.7672  | 948.8430  |
| 1012.3083  | 1043.4596 | 1061.9804 |
| 1159.0661  | 1182.4492 | 1324.3978 |
| 1350.8206  | 1451.1165 | 1493.5609 |
| 1526.8393  | 1648.5546 | 2142.2827 |
| 3020.7993  | 3055.3319 | 3134.0513 |
| 3141.9589  | 3161.5684 | 3225.3452 |

**TS i3\_i6, C<sub>1</sub>, <sup>2</sup>A**

|   |   |           |           |           |
|---|---|-----------|-----------|-----------|
| 6 | 0 | -0.597113 | 1.049418  | 0.008274  |
| 6 | 0 | -1.553680 | -0.135957 | -0.032049 |
| 6 | 0 | -0.527470 | -1.153176 | -0.113139 |
| 6 | 0 | 0.451365  | -0.060880 | -0.013831 |
| 6 | 0 | 1.929626  | -0.043587 | 0.009625  |
| 1 | 0 | -0.643810 | 1.697987  | -0.876029 |
| 1 | 0 | -0.621783 | 1.687849  | 0.898166  |
| 1 | 0 | -1.306005 | -1.009233 | 0.915772  |
| 1 | 0 | -2.632218 | -0.212121 | -0.147174 |
| 1 | 0 | 2.348351  | 0.534383  | -0.825516 |
| 1 | 0 | 2.315268  | 0.426629  | 0.925883  |
| 1 | 0 | 2.323828  | -1.060400 | -0.044385 |

**Frequencies**

|            |           |           |
|------------|-----------|-----------|
| 1233.8396i | 95.0019   | 163.5845  |
| 322.8532   | 389.1484  | 640.0288  |
| 747.7264   | 866.7429  | 876.4911  |
| 930.0729   | 946.8588  | 1002.4386 |
| 1027.7889  | 1111.6486 | 1165.2500 |
| 1224.5085  | 1241.2756 | 1313.8368 |
| 1353.4502  | 1414.9333 | 1464.5329 |
| 1480.4125  | 1492.8847 | 2094.7123 |

|           |           |           |
|-----------|-----------|-----------|
| 2982.9866 | 3012.0886 | 3014.5513 |
| 3060.6989 | 3104.7709 | 3157.3533 |

**TS i4\_i6, C<sub>1</sub>, <sup>2</sup>A**

|   |   |           |           |           |
|---|---|-----------|-----------|-----------|
| 6 | 0 | -1.295338 | -0.986853 | -0.077283 |
| 6 | 0 | -1.524893 | 0.395079  | 0.075281  |
| 6 | 0 | -0.252408 | 1.008700  | -0.114856 |
| 1 | 0 | -1.857705 | -1.733017 | 0.486524  |
| 1 | 0 | -0.872324 | -1.360349 | -1.001118 |
| 1 | 0 | -2.402929 | 0.840831  | 0.534172  |
| 1 | 0 | -0.024387 | 2.036115  | -0.397624 |
| 6 | 0 | 0.620158  | 0.000850  | 0.130424  |
| 6 | 0 | 2.076395  | -0.232827 | 0.042198  |
| 1 | 0 | 2.495123  | -0.567242 | 0.997693  |
| 1 | 0 | 2.310740  | -1.007921 | -0.695767 |
| 1 | 0 | 2.608003  | 0.681890  | -0.258462 |

Frequencies

|           |           |           |
|-----------|-----------|-----------|
| 690.8638i | 130.0488  | 234.2471  |
| 252.7724  | 457.5432  | 627.8148  |
| 666.8348  | 756.2711  | 873.2861  |
| 914.8565  | 929.0850  | 1007.2579 |
| 1040.3270 | 1045.8165 | 1070.2426 |
| 1192.0573 | 1299.7673 | 1405.0010 |
| 1410.9692 | 1472.7581 | 1488.2515 |
| 1525.4872 | 1588.4826 | 2979.6294 |
| 3046.1886 | 3060.2748 | 3092.2481 |
| 3119.9371 | 3161.8103 | 3194.9711 |

**TS i5\_i7, C<sub>1</sub>, <sup>2</sup>A**

|   |   |           |           |           |
|---|---|-----------|-----------|-----------|
| 6 | 0 | -1.728819 | -0.878998 | 0.053662  |
| 6 | 0 | -1.342088 | 0.430642  | -0.149693 |
| 6 | 0 | -0.054676 | 0.936944  | 0.000790  |
| 1 | 0 | -2.758756 | -1.186041 | -0.082329 |
| 1 | 0 | -1.016088 | -1.641418 | 0.346239  |
| 1 | 0 | -2.109548 | 1.139165  | -0.457004 |
| 1 | 0 | 0.105637  | 1.997229  | -0.182345 |
| 6 | 0 | 1.109174  | 0.149434  | 0.460296  |
| 6 | 0 | 1.984152  | -0.462453 | -0.334884 |
| 1 | 0 | 1.255157  | 0.086061  | 1.541459  |
| 1 | 0 | 2.827860  | -1.013172 | 0.069264  |
| 1 | 0 | 1.889276  | -0.435232 | -1.416313 |

Frequencies

|           |           |           |
|-----------|-----------|-----------|
| 168.4178i | 209.1495  | 242.2837  |
| 438.6149  | 502.5384  | 521.7312  |
| 674.4822  | 722.1376  | 797.3508  |
| 915.8922  | 948.2212  | 987.0610  |
| 1010.7785 | 1035.9200 | 1086.2238 |
| 1170.9448 | 1235.8155 | 1323.2581 |
| 1414.0887 | 1448.1237 | 1469.8148 |
| 1530.9041 | 1694.8746 | 3080.0420 |

|           |           |           |
|-----------|-----------|-----------|
| 3125.9348 | 3130.1336 | 3143.4631 |
| 3151.0550 | 3212.4426 | 3240.2754 |

**TS i5\_p3, C<sub>1</sub>, <sup>2</sup>A**

|   |   |           |           |           |
|---|---|-----------|-----------|-----------|
| 6 | 0 | 2.446479  | -0.279163 | -0.091644 |
| 6 | 0 | 1.219205  | 0.157663  | -0.027847 |
| 6 | 0 | -0.055972 | 0.477145  | -0.201560 |
| 6 | 0 | -1.171586 | -0.395894 | 0.123113  |
| 6 | 0 | -2.456817 | -0.048970 | -0.021310 |
| 1 | 0 | 3.146983  | -0.181596 | 0.730592  |
| 1 | 0 | 2.810872  | -0.759475 | -0.997537 |
| 1 | 0 | 1.370633  | 1.186580  | 1.812406  |
| 1 | 0 | -0.291958 | 1.478917  | -0.559763 |
| 1 | 0 | -0.918192 | -1.384769 | 0.496966  |
| 1 | 0 | -3.259577 | -0.735855 | 0.220518  |
| 1 | 0 | -2.746616 | 0.931509  | -0.387698 |

**Frequencies**

|           |           |           |
|-----------|-----------|-----------|
| 535.7194i | 109.0942  | 132.0522  |
| 180.5769  | 394.5771  | 410.0850  |
| 434.1939  | 527.7824  | 577.3346  |
| 726.1459  | 883.8120  | 896.8376  |
| 920.9558  | 926.4479  | 1017.8247 |
| 1028.2215 | 1108.5018 | 1194.5195 |
| 1318.6706 | 1343.8199 | 1452.2266 |
| 1488.3948 | 1668.1700 | 1979.9752 |
| 3113.7229 | 3121.3108 | 3137.3352 |
| 3157.2277 | 3195.4103 | 3225.1671 |

**TS i7\_i8, C<sub>1</sub>, <sup>2</sup>A**

|   |   |           |           |           |
|---|---|-----------|-----------|-----------|
| 6 | 0 | 1.186883  | -0.832485 | 0.232129  |
| 6 | 0 | 1.166216  | 0.484051  | -0.170582 |
| 6 | 0 | -0.068699 | 1.202424  | 0.084055  |
| 6 | 0 | -1.181006 | 0.435036  | 0.087253  |
| 6 | 0 | -1.057282 | -1.010569 | -0.198724 |
| 1 | 0 | 1.900741  | -1.536623 | -0.188726 |
| 1 | 0 | 0.788421  | -1.116545 | 1.198286  |
| 1 | 0 | 1.885332  | 0.869437  | -0.889306 |
| 1 | 0 | -0.110351 | 2.283927  | 0.176637  |
| 1 | 0 | -2.162616 | 0.876021  | 0.259335  |
| 1 | 0 | -1.070517 | -1.318896 | -1.243441 |
| 1 | 0 | -1.507684 | -1.728064 | 0.482432  |

**Frequencies**

|           |           |           |
|-----------|-----------|-----------|
| 664.0256i | 211.1516  | 405.5334  |
| 451.2543  | 509.8537  | 641.0945  |
| 713.4212  | 731.6345  | 773.3953  |
| 867.8536  | 933.1978  | 958.1684  |
| 987.0691  | 1011.5938 | 1047.5376 |
| 1072.7464 | 1167.4681 | 1248.4852 |
| 1379.0849 | 1429.7879 | 1456.3026 |
| 1542.9448 | 1598.2682 | 3089.3519 |

|           |           |           |
|-----------|-----------|-----------|
| 3115.8509 | 3124.3808 | 3145.9614 |
| 3170.7307 | 3173.5753 | 3204.3919 |

**TS i6\_p4, C<sub>1</sub>, <sup>2</sup>A**

|   |   |           |           |           |
|---|---|-----------|-----------|-----------|
| 6 | 0 | -0.589442 | -1.061573 | -0.013451 |
| 6 | 0 | -1.555454 | 0.112791  | 0.073065  |
| 6 | 0 | -0.590326 | 1.044826  | -0.011070 |
| 6 | 0 | 0.474677  | 0.040660  | -0.106390 |
| 6 | 0 | 1.807931  | 0.037630  | -0.183888 |
| 1 | 0 | -0.522185 | -1.688985 | 0.878713  |
| 1 | 0 | -0.680722 | -1.691963 | -0.901105 |
| 1 | 0 | -2.633108 | 0.161530  | 0.169987  |
| 1 | 0 | -0.587312 | 2.127980  | -0.007001 |
| 1 | 0 | 2.358961  | -0.891025 | -0.278271 |
| 1 | 0 | 2.369846  | 0.961488  | -0.263059 |
| 1 | 0 | 2.410209  | -0.025030 | 1.851137  |

Frequencies

|           |           |           |
|-----------|-----------|-----------|
| 467.4144i | 165.9846  | 205.5651  |
| 290.8743  | 344.4019  | 496.5250  |
| 719.9974  | 758.5257  | 796.8401  |
| 886.0091  | 922.3448  | 929.7243  |
| 963.8891  | 989.5787  | 1020.7205 |
| 1114.2315 | 1116.3767 | 1206.2035 |
| 1223.0591 | 1334.6128 | 1451.7850 |
| 1487.4349 | 1619.7200 | 1727.0274 |
| 3075.0837 | 3127.9909 | 3155.5985 |
| 3208.9634 | 3239.3431 | 3246.3072 |

**TS i8\_p5, C<sub>1</sub>, <sup>2</sup>A**

|   |   |           |           |           |
|---|---|-----------|-----------|-----------|
| 6 | 0 | -1.158357 | 0.017926  | -0.143116 |
| 6 | 0 | -0.405645 | 1.140787  | -0.107615 |
| 6 | 0 | 0.999308  | 0.774147  | 0.040445  |
| 6 | 0 | 1.108635  | -0.565103 | 0.061524  |
| 6 | 0 | -0.250860 | -1.179115 | -0.089608 |
| 1 | 0 | -1.774566 | 0.029768  | 1.933299  |
| 1 | 0 | -2.222021 | -0.037670 | -0.331185 |
| 1 | 0 | -0.778051 | 2.156100  | -0.166479 |
| 1 | 0 | 1.814091  | 1.483392  | 0.120620  |
| 1 | 0 | 2.022171  | -1.136062 | 0.165976  |
| 1 | 0 | -0.497198 | -1.866559 | 0.726505  |
| 1 | 0 | -0.322914 | -1.760812 | -1.018506 |

Frequencies

|           |           |           |
|-----------|-----------|-----------|
| 508.4633i | 232.6940  | 298.9192  |
| 377.1882  | 526.0279  | 694.5577  |
| 770.5335  | 819.5560  | 822.2006  |
| 920.1854  | 939.1052  | 961.3748  |
| 968.1171  | 984.9154  | 1031.7064 |
| 1114.3274 | 1136.5456 | 1148.1800 |
| 1287.1151 | 1333.7608 | 1415.8275 |
| 1439.7872 | 1549.8819 | 1653.1867 |

|           |           |           |
|-----------|-----------|-----------|
| 3051.3095 | 3099.9399 | 3220.0401 |
| 3231.1576 | 3248.8938 | 3255.9883 |

**TS i7\_p6, C<sub>1</sub>, <sup>2</sup>A**

|   |   |           |           |           |
|---|---|-----------|-----------|-----------|
| 6 | 0 | -2.136084 | -0.492168 | -0.156938 |
| 6 | 0 | -1.057128 | 0.220938  | 0.007391  |
| 6 | 0 | 0.060503  | 0.925816  | -0.073949 |
| 6 | 0 | 1.422671  | 0.387720  | -0.090554 |
| 6 | 0 | 1.771710  | -0.895289 | 0.052509  |
| 1 | 0 | -2.729608 | -0.858013 | 0.674232  |
| 1 | 0 | -2.482100 | -0.741115 | -1.158391 |
| 1 | 0 | -1.174056 | 0.451799  | 2.143516  |
| 1 | 0 | -0.034604 | 2.010491  | -0.088674 |
| 1 | 0 | 2.203897  | 1.130877  | -0.231493 |
| 1 | 0 | 1.035236  | -1.675988 | 0.214383  |
| 1 | 0 | 2.811202  | -1.200155 | 0.015667  |

Frequencies

|           |           |           |
|-----------|-----------|-----------|
| 498.6004i | 73.7314   | 129.1269  |
| 161.7628  | 375.9380  | 398.0426  |
| 410.5682  | 522.5301  | 655.1662  |
| 711.9156  | 880.4026  | 899.6266  |
| 920.1778  | 926.3654  | 1017.1987 |
| 1018.7858 | 1051.4993 | 1154.4379 |
| 1340.4570 | 1385.0246 | 1453.4387 |
| 1477.4355 | 1670.8337 | 1982.1035 |
| 3111.4180 | 3126.1568 | 3139.7751 |
| 3152.8866 | 3191.8228 | 3227.3212 |

**TS i1\_p1, C<sub>1</sub>, <sup>2</sup>A**

|   |   |           |           |           |
|---|---|-----------|-----------|-----------|
| 6 | 0 | -2.356525 | -0.554186 | 0.036307  |
| 6 | 0 | -1.431621 | 0.416562  | -0.168981 |
| 6 | 0 | -0.022744 | 0.204186  | -0.079792 |
| 6 | 0 | 1.171100  | 0.041617  | -0.034166 |
| 6 | 0 | 2.612004  | -0.158390 | 0.034661  |
| 1 | 0 | -2.078361 | -1.530703 | 0.414786  |
| 1 | 0 | -3.410073 | -0.358436 | -0.124666 |
| 1 | 0 | -1.745447 | 1.346789  | -0.636690 |
| 1 | 0 | -1.611386 | 1.481524  | 1.454478  |
| 1 | 0 | 2.963354  | -0.144431 | 1.071001  |
| 1 | 0 | 2.901214  | -1.120014 | -0.399746 |
| 1 | 0 | 3.147416  | 0.626536  | -0.507341 |

Frequencies

|           |           |           |
|-----------|-----------|-----------|
| 746.7916i | 32.5389   | 139.7541  |
| 172.5366  | 322.9905  | 349.0111  |
| 412.0885  | 437.1067  | 537.6796  |
| 671.6971  | 721.1210  | 889.5501  |
| 1024.0141 | 1050.7239 | 1059.5875 |
| 1064.0525 | 1190.8712 | 1302.0614 |
| 1430.0129 | 1447.1485 | 1495.2409 |
| 1495.5360 | 1596.2585 | 2341.0204 |

|           |           |           |
|-----------|-----------|-----------|
| 3026.1037 | 3079.9850 | 3084.1646 |
| 3139.6569 | 3150.1644 | 3243.8613 |

**TS i1\_p7, C<sub>s</sub>, <sup>2</sup>A'**

|   |   |           |           |           |
|---|---|-----------|-----------|-----------|
| 6 | 0 | -1.510576 | 0.810040  | -0.000057 |
| 6 | 0 | -1.629255 | -0.705403 | 0.000037  |
| 6 | 0 | -0.306890 | -0.047596 | -0.000022 |
| 6 | 0 | 0.970552  | -0.141543 | 0.000008  |
| 6 | 0 | 2.286098  | -0.177346 | 0.000032  |
| 1 | 0 | -1.751462 | 1.341440  | -0.915256 |
| 1 | 0 | -1.751433 | 1.341555  | 0.915082  |
| 1 | 0 | -1.951743 | -1.192515 | 0.914874  |
| 1 | 0 | -1.951776 | -1.192623 | -0.914732 |
| 1 | 0 | 2.841393  | -0.275770 | -0.927175 |
| 1 | 0 | 2.841361  | -0.275660 | 0.927271  |
| 1 | 0 | 2.864087  | 1.824665  | -0.000049 |

Frequencies

|           |           |           |
|-----------|-----------|-----------|
| 513.4156i | 156.2699  | 177.1858  |
| 233.0303  | 313.1771  | 370.5872  |
| 569.2306  | 658.9576  | 676.2946  |
| 789.8832  | 901.8050  | 933.4300  |
| 950.7775  | 1016.7176 | 1042.1825 |
| 1058.9950 | 1079.0459 | 1093.6082 |
| 1190.7174 | 1367.8828 | 1468.9383 |
| 1485.3687 | 1544.6976 | 2109.7687 |
| 3135.5624 | 3138.3192 | 3153.0426 |
| 3218.1077 | 3231.8241 | 3237.2924 |

**TS p1\_i9, C<sub>1</sub>, <sup>1</sup>A**

|   |   |           |           |           |
|---|---|-----------|-----------|-----------|
| 6 | 0 | 2.342442  | 0.510879  | 0.059514  |
| 6 | 0 | 1.416351  | -0.474596 | -0.027832 |
| 6 | 0 | 0.045391  | -0.298440 | -0.188436 |
| 6 | 0 | -1.189188 | -0.139471 | 0.038223  |
| 6 | 0 | -2.553911 | 0.239138  | -0.093800 |
| 1 | 0 | 2.063458  | 1.558344  | 0.068922  |
| 1 | 0 | 3.399747  | 0.276170  | 0.067846  |
| 1 | 0 | 1.763737  | -1.507435 | -0.065598 |
| 1 | 0 | -1.458716 | -0.209866 | 1.149507  |
| 1 | 0 | -2.814261 | 1.283344  | -0.230330 |
| 1 | 0 | -3.320475 | -0.425618 | 0.283635  |

Frequencies

|           |           |           |
|-----------|-----------|-----------|
| 833.3676i | 101.3902  | 150.9472  |
| 257.6607  | 326.4471  | 488.0054  |
| 544.5989  | 580.7431  | 666.4332  |
| 764.0316  | 794.1218  | 848.9501  |
| 976.3891  | 1043.6237 | 1067.7131 |
| 1249.6470 | 1308.6267 | 1453.3605 |
| 1465.2434 | 1604.5149 | 2002.2963 |
| 2665.8739 | 3113.9526 | 3137.9945 |
| 3148.6052 | 3238.0132 | 3239.1298 |

**TS i9\_i10, C<sub>1</sub>, <sup>1</sup>A**

|   |   |           |           |           |
|---|---|-----------|-----------|-----------|
| 6 | 0 | 2.489194  | 0.119350  | -0.189351 |
| 6 | 0 | 1.209421  | -0.106983 | 0.075772  |
| 6 | 0 | -0.061740 | -0.516302 | 0.130212  |
| 6 | 0 | -1.199050 | 0.401058  | 0.096487  |
| 6 | 0 | -2.424304 | -0.073585 | -0.153705 |
| 1 | 0 | 2.854436  | 0.001463  | -1.202487 |
| 1 | 0 | 3.190403  | 0.424651  | 0.574888  |
| 1 | 0 | 0.789474  | -0.291434 | 1.224212  |
| 1 | 0 | -1.047894 | 1.478485  | 0.194151  |
| 1 | 0 | -2.592970 | -1.140638 | -0.252335 |
| 1 | 0 | -3.274570 | 0.586246  | -0.294922 |

## Frequencies

|           |           |           |
|-----------|-----------|-----------|
| 808.8255i | 63.5329   | 168.4580  |
| 355.9364  | 431.8686  | 536.7202  |
| 548.8807  | 705.6063  | 724.4337  |
| 862.1774  | 885.8593  | 990.0917  |
| 1007.2399 | 1081.8705 | 1113.4335 |
| 1216.9459 | 1329.6033 | 1436.6303 |
| 1464.3800 | 1666.4778 | 1867.0169 |
| 2262.0889 | 3081.6591 | 3140.9354 |
| 3158.3894 | 3231.5467 | 3245.2986 |

**TS i10\_i11, C<sub>1</sub>, <sup>1</sup>A**

|   |   |           |           |           |
|---|---|-----------|-----------|-----------|
| 6 | 0 | 2.343730  | -0.406353 | 0.130687  |
| 6 | 0 | 1.179732  | 0.131537  | -0.100192 |
| 6 | 0 | 0.013703  | 0.670787  | -0.332543 |
| 6 | 0 | -1.242942 | 0.294979  | 0.379806  |
| 6 | 0 | -2.153230 | -0.546621 | -0.098957 |
| 1 | 0 | 3.019524  | -0.000623 | 0.879011  |
| 1 | 0 | 2.683848  | -1.282898 | -0.414312 |
| 1 | 0 | -0.053566 | 1.462037  | -1.080939 |
| 1 | 0 | -1.410384 | 0.771344  | 1.345286  |
| 1 | 0 | -2.026024 | -1.043401 | -1.056091 |
| 1 | 0 | -3.059355 | -0.772433 | 0.454239  |

## Frequencies

|           |           |           |
|-----------|-----------|-----------|
| 154.0185i | 179.4887  | 301.0425  |
| 358.0214  | 498.3091  | 613.2659  |
| 694.6721  | 860.7164  | 874.9515  |
| 921.9422  | 950.2100  | 1013.2348 |
| 1029.0418 | 1088.0065 | 1153.0222 |
| 1325.3124 | 1340.3552 | 1449.6822 |
| 1484.6809 | 1700.2818 | 2054.3647 |
| 3097.1365 | 3114.9003 | 3118.4977 |
| 3133.6964 | 3184.7445 | 3214.4743 |

**TS i11\_i12, C<sub>1</sub>, <sup>1</sup>A**

|   |   |           |           |           |
|---|---|-----------|-----------|-----------|
| 6 | 0 | -2.121331 | 0.265950  | 0.107747  |
| 6 | 0 | -0.822776 | -0.088655 | -0.145641 |

|   |   |           |           |           |
|---|---|-----------|-----------|-----------|
| 6 | 0 | 0.125617  | 0.931305  | -0.096078 |
| 6 | 0 | 1.429559  | 0.408768  | 0.079386  |
| 6 | 0 | 1.544972  | -0.947940 | -0.066944 |
| 1 | 0 | -2.654221 | -1.139099 | -0.255514 |
| 1 | 0 | -2.683977 | 0.417310  | 0.739314  |
| 1 | 0 | -0.097505 | 1.985084  | -0.232162 |
| 1 | 0 | 2.275129  | 1.055655  | 0.312953  |
| 1 | 0 | -0.052854 | -1.046488 | -0.369591 |
| 1 | 0 | 2.277181  | -1.497627 | 0.534171  |

Frequencies

|                    |           |           |
|--------------------|-----------|-----------|
| 1097.2722 <i>i</i> | 244.2033  | 342.8084  |
| 424.1996           | 475.7972  | 664.7558  |
| 736.0946           | 787.0722  | 876.7381  |
| 893.8683           | 943.7594  | 958.0513  |
| 1005.2966          | 1077.0155 | 1130.3121 |
| 1169.4036          | 1195.0092 | 1380.8759 |
| 1466.5881          | 1490.4650 | 1721.6570 |
| 1831.5311          | 3079.2929 | 3116.8428 |
| 3128.9041          | 3180.4368 | 3196.8222 |

**TS i12\_p5**, C<sub>1</sub>, <sup>1</sup>A

|   |   |           |           |           |
|---|---|-----------|-----------|-----------|
| 6 | 0 | 1.931255  | -0.458119 | -0.313166 |
| 6 | 0 | 1.051594  | 0.193139  | 0.440098  |
| 6 | 0 | -0.159497 | 0.888666  | -0.041508 |
| 6 | 0 | -1.408600 | 0.344782  | -0.125286 |
| 6 | 0 | -1.607043 | -1.020818 | 0.211548  |
| 1 | 0 | 2.819510  | -0.904172 | 0.120581  |
| 1 | 0 | 1.792325  | -0.582859 | -1.382385 |
| 1 | 0 | 1.232915  | 0.296071  | 1.511177  |
| 1 | 0 | -0.017595 | 1.913762  | -0.389092 |
| 1 | 0 | -2.203198 | 0.989870  | -0.518904 |
| 1 | 0 | -2.470216 | -1.398572 | -0.371490 |

Frequencies

|                   |           |           |
|-------------------|-----------|-----------|
| 240.5498 <i>i</i> | 205.9290  | 234.6041  |
| 365.8134          | 438.7771  | 507.1942  |
| 700.1238          | 838.2837  | 918.0924  |
| 938.6363          | 973.2317  | 993.6023  |
| 1074.8706         | 1091.2854 | 1144.0307 |
| 1233.7416         | 1314.9200 | 1431.7920 |
| 1465.6432         | 1576.3170 | 1708.0891 |
| 2944.1485         | 3033.0861 | 3107.9122 |
| 3111.8890         | 3138.6287 | 3222.0028 |

**TS i9\_i13**, C<sub>1</sub>, <sup>1</sup>A

|   |   |          |           |           |
|---|---|----------|-----------|-----------|
| 6 | 0 | 1.510096 | 0.870480  | 0.169964  |
| 6 | 0 | 1.360649 | -0.449617 | -0.074869 |
| 6 | 0 | 0.069556 | -1.073160 | -0.213620 |
| 1 | 0 | 0.665623 | 1.484311  | 0.467259  |
| 1 | 0 | 2.463010 | 1.375194  | 0.032284  |
| 1 | 0 | 2.237728 | -1.038687 | -0.339622 |



|   |   |           |           |           |
|---|---|-----------|-----------|-----------|
| 6 | 0 | -1.121181 | -0.471077 | 0.253838  |
| 6 | 0 | -1.748645 | 0.652503  | -0.174369 |
| 1 | 0 | -1.692924 | -1.136435 | 0.909207  |
| 1 | 0 | -1.319805 | 1.289069  | -0.940908 |
| 1 | 0 | -2.776486 | 0.851777  | 0.106114  |

Frequencies

|                   |           |           |
|-------------------|-----------|-----------|
| 220.4711 <i>i</i> | 184.6999  | 249.8227  |
| 393.8817          | 466.6459  | 610.6447  |
| 733.5730          | 818.1952  | 876.1199  |
| 942.5098          | 1005.0634 | 1032.1618 |
| 1036.2737         | 1094.4293 | 1270.1636 |
| 1293.0517         | 1343.0995 | 1433.0043 |
| 1462.5714         | 1577.3289 | 1601.6378 |
| 3068.6857         | 3118.5855 | 3129.4908 |
| 3136.8892         | 3218.0341 | 3223.7436 |

TS i13\_i14, C<sub>1</sub>, <sup>1</sup>A

|   |   |           |           |           |
|---|---|-----------|-----------|-----------|
| 6 | 0 | 1.094211  | -0.831374 | -0.322985 |
| 6 | 0 | 1.098966  | 0.483709  | 0.209290  |
| 6 | 0 | 0.000032  | 1.298569  | -0.000011 |
| 6 | 0 | -1.098941 | 0.483748  | -0.209281 |
| 6 | 0 | -1.094254 | -0.831321 | 0.323004  |
| 1 | 0 | 1.850953  | -1.548485 | 0.000309  |
| 1 | 0 | 0.702339  | -1.031111 | -1.310771 |
| 1 | 0 | 1.924309  | 0.769547  | 0.862982  |
| 1 | 0 | -1.924231 | 0.769583  | -0.863024 |
| 1 | 0 | -0.702470 | -1.031071 | 1.310821  |
| 1 | 0 | -1.850983 | -1.548442 | -0.000417 |

Frequencies

|                   |           |           |
|-------------------|-----------|-----------|
| 471.4690 <i>i</i> | 339.9278  | 448.4303  |
| 560.1148          | 673.6019  | 686.9734  |
| 724.5266          | 892.0580  | 931.5127  |
| 959.2705          | 988.8936  | 1003.1529 |
| 1015.1351         | 1138.2509 | 1163.8984 |
| 1197.6461         | 1306.1393 | 1389.4086 |
| 1462.5218         | 1519.0999 | 1526.7075 |
| 3095.4106         | 3096.1164 | 3117.6310 |
| 3117.8368         | 3227.7024 | 3227.7643 |

TS i14\_i15, C<sub>1</sub>, <sup>1</sup>A

|   |   |           |           |           |
|---|---|-----------|-----------|-----------|
| 6 | 0 | -0.619057 | 1.021263  | 0.011193  |
| 6 | 0 | -1.166135 | -0.406670 | 0.051996  |
| 6 | 0 | -0.217371 | -1.380414 | -0.051659 |
| 6 | 0 | 1.059861  | -0.584082 | -0.039991 |
| 6 | 0 | 0.841064  | 0.837452  | -0.047321 |
| 1 | 0 | -0.977175 | 1.811060  | 0.683591  |
| 1 | 0 | -0.884642 | 1.356541  | -1.009508 |
| 1 | 0 | -2.240313 | -0.558711 | -0.002275 |
| 1 | 0 | 2.054062  | -1.002167 | -0.186420 |
| 1 | 0 | 1.069144  | -0.154073 | 1.070254  |

|   |   |          |          |           |
|---|---|----------|----------|-----------|
| 1 | 0 | 1.588756 | 1.622056 | -0.100947 |
|---|---|----------|----------|-----------|

Frequencies

|           |           |           |
|-----------|-----------|-----------|
| 977.2674i | 358.8121  | 485.1896  |
| 614.9816  | 703.6479  | 784.7415  |
| 805.8309  | 857.8909  | 877.9707  |
| 886.6630  | 927.9955  | 987.3493  |
| 1035.2632 | 1039.2717 | 1223.4587 |
| 1242.2881 | 1269.6261 | 1314.3677 |
| 1351.0251 | 1398.3561 | 1444.2162 |
| 2427.0069 | 2964.4718 | 3034.9801 |
| 3148.6154 | 3161.5424 | 3190.4527 |

**TS i15\_i16, C<sub>1</sub>, <sup>1</sup>A**

|   |   |           |           |           |
|---|---|-----------|-----------|-----------|
| 6 | 0 | 1.197809  | 0.478617  | 0.045514  |
| 6 | 0 | 0.217079  | 1.363628  | -0.216526 |
| 6 | 0 | -0.640285 | -0.676061 | -0.386069 |
| 6 | 0 | 0.752856  | -0.942697 | 0.174379  |
| 6 | 0 | -1.482178 | 0.141387  | 0.287063  |
| 1 | 0 | 2.229880  | 0.828752  | 0.078829  |
| 1 | 0 | -0.820459 | -0.905484 | -1.431582 |
| 1 | 0 | 1.324928  | -1.643483 | -0.439897 |
| 1 | 0 | 0.743406  | -1.328884 | 1.200972  |
| 1 | 0 | -2.370260 | 0.541884  | -0.185723 |
| 1 | 0 | -1.379182 | 0.317972  | 1.351230  |

Frequencies

|           |           |           |
|-----------|-----------|-----------|
| 266.9294i | 275.4210  | 335.0871  |
| 444.0050  | 650.9071  | 734.3985  |
| 790.3895  | 925.4443  | 937.7015  |
| 967.1524  | 979.9531  | 999.9746  |
| 1097.8234 | 1136.7979 | 1205.2719 |
| 1298.8802 | 1313.7900 | 1451.4715 |
| 1500.9978 | 1592.9886 | 1634.8810 |
| 3015.8501 | 3071.7685 | 3120.9374 |
| 3155.7607 | 3179.9009 | 3244.5840 |

**TS i16\_i17, C<sub>1</sub>, <sup>1</sup>A**

|   |   |           |           |           |
|---|---|-----------|-----------|-----------|
| 6 | 0 | -1.375117 | 0.079931  | 0.084658  |
| 6 | 0 | -1.661902 | -1.131006 | -0.273349 |
| 6 | 0 | -0.185940 | 1.001795  | 0.151715  |
| 1 | 0 | -2.366317 | 0.446308  | 0.421311  |
| 1 | 0 | -0.408550 | 1.893982  | -0.440852 |
| 1 | 0 | -0.074470 | 1.353913  | 1.184208  |
| 6 | 0 | 1.683046  | -0.693134 | 0.220057  |
| 6 | 0 | 1.108037  | 0.369904  | -0.330091 |
| 1 | 0 | 2.611859  | -1.096498 | -0.168599 |
| 1 | 0 | 1.246034  | -1.212548 | 1.068654  |
| 1 | 0 | 1.582698  | 0.849906  | -1.182662 |

Frequencies

|           |          |          |
|-----------|----------|----------|
| 143.2436i | 114.7243 | 152.4744 |
|-----------|----------|----------|

|                   |           |           |
|-------------------|-----------|-----------|
| 301.6002          | 463.4210  | 553.3920  |
| 650.7021 <i>i</i> | 843.0894  | 911.6097  |
| 936.8535          | 954.5132  | 1011.7154 |
| 1015.3797         | 1121.2083 | 1253.6237 |
| 1342.2549         | 1361.8615 | 1457.4701 |
| 1496.7691         | 1714.5651 | 1797.0185 |
| 2968.6888         | 3025.2990 | 3063.7828 |
| 3131.3961         | 3148.1267 | 3215.5641 |

**TS i17\_p5, C<sub>s</sub>, <sup>1</sup>A'**

|   |   |           |           |           |
|---|---|-----------|-----------|-----------|
| 6 | 0 | 1.248113  | 0.013245  | 0.000006  |
| 6 | 0 | 0.888618  | -1.255838 | -0.000005 |
| 6 | 0 | -1.157909 | -0.772342 | -0.000008 |
| 6 | 0 | -1.085495 | 0.544633  | -0.000025 |
| 6 | 0 | 0.273845  | 1.163890  | -0.000004 |
| 1 | 0 | 2.315347  | 0.225690  | 0.000038  |
| 1 | 0 | -2.036912 | -1.410516 | 0.000112  |
| 1 | 0 | -1.975045 | 1.172211  | 0.000029  |
| 1 | 0 | 0.420379  | 1.812339  | 0.875124  |
| 1 | 0 | 0.420461  | 1.812434  | -0.875045 |
| 1 | 0 | -0.147259 | -1.773688 | -0.000046 |

**Frequencies**

|                    |           |           |
|--------------------|-----------|-----------|
| 1123.8655 <i>i</i> | 321.9649  | 419.2117  |
| 474.1546           | 522.5805  | 654.3117  |
| 704.6967           | 778.0634  | 813.8329  |
| 880.4673           | 916.8535  | 964.7284  |
| 972.8015           | 1053.6996 | 1179.3394 |
| 1193.7741          | 1267.4413 | 1335.2285 |
| 1462.2691          | 1631.4910 | 1675.0588 |
| 2652.4760          | 3007.6517 | 3025.8793 |
| 3134.9430          | 3149.3892 | 3180.5767 |
